# Supplementary material
Source: PubMed Central journal article supplement (PMC3230293)

Supplemental figure-1

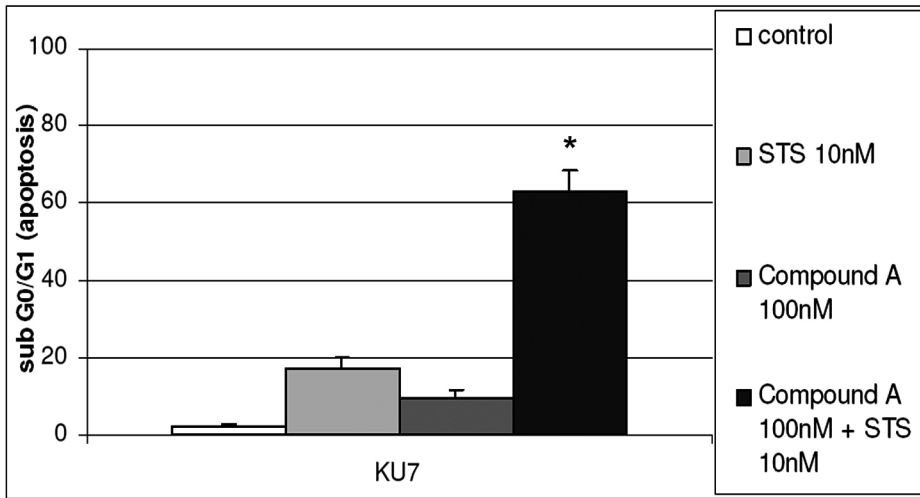

## Supplemental figure-2

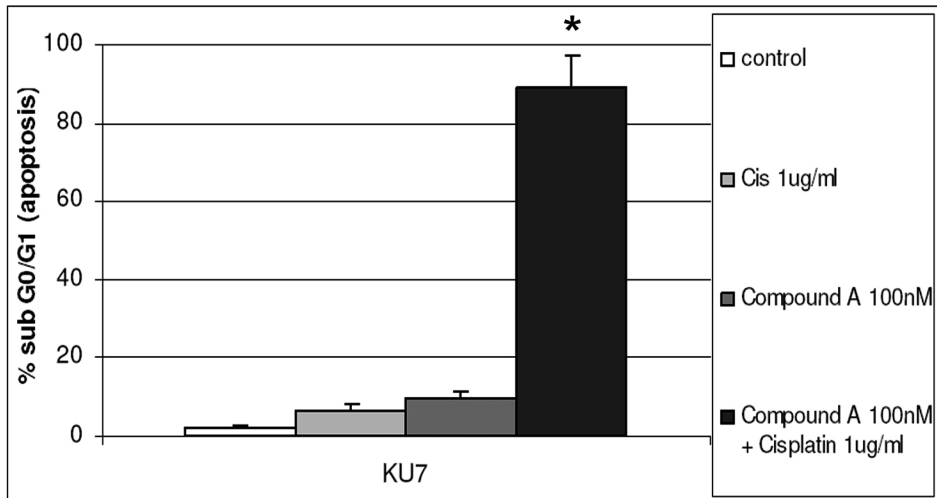

## Supplemental figure-3

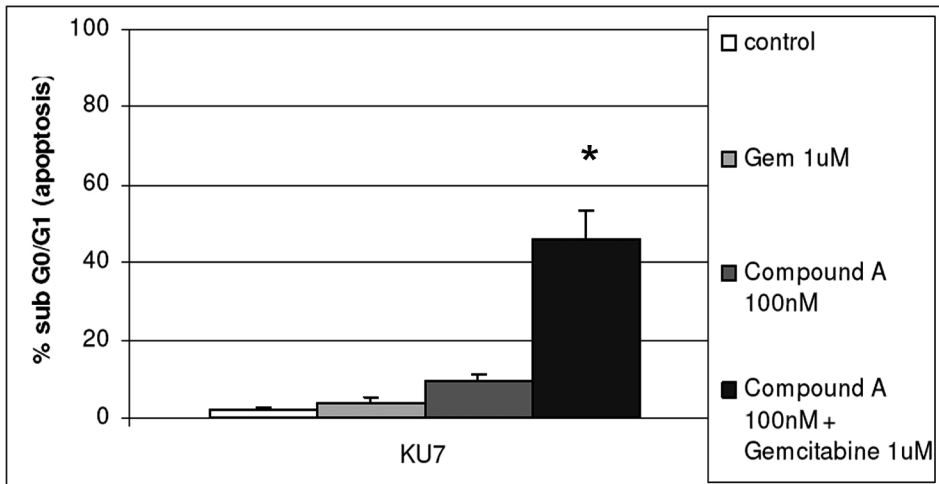

## Supplemental figure-4

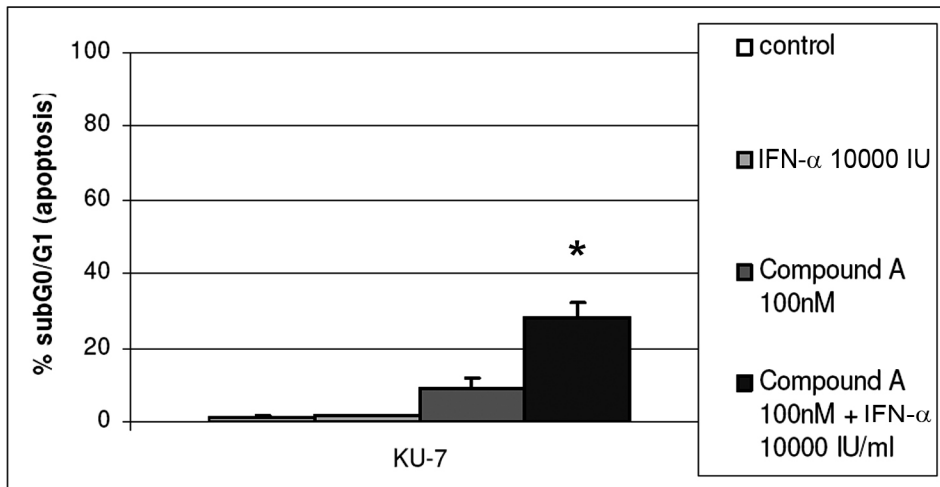

Supplement: cbt1009_0885SD1.pdf [file cbt1009_0885SD1.pdf]
